# Supplementary material for: A g-C3N4/rGO/Cs3Bi2Br9 mediated Z-scheme heterojunction for enhanced photocatalytic CO2 reduction
Source: Royal Society of Chemistry journal article supplement (doi:10.1039/d4ta01857e), 2024-01-01
Supplement: d4ta01857e1.pdf [file d4ta01857e1.pdf]

## Supporting Information

### **g-C<sub>3</sub>N<sub>4</sub>/rGO/Cs<sub>3</sub>Bi<sub>2</sub>Br<sub>9</sub> mediated Z-scheme heterojunction for enhanced photocatalytic CO<sub>2</sub> reduction**

*Yasmine Baghdadi<sup>a</sup>, Matyas Daboczi<sup>a</sup>, Filipp Temerov<sup>a,b</sup>, Mengya Yang<sup>a</sup>, Junyi Cui<sup>a</sup>, Salvador Eslava<sup>\*a</sup>*

<sup>a</sup> Department of Chemical Engineering, Imperial College London, London SW7 2AZ, United Kingdom.

<sup>b</sup> Nano and molecular system (NANOMO) research unit, University of Oulu, Oulu 90570, Finland.

E-mail: [s.eslava@imperial.ac.uk](mailto:s.eslava@imperial.ac.uk)

## Apparent quantum yield calculations

To measure the apparent quantum yield (AQE), the sample was tested in the same experimental setup using the same conditions while replacing the 300 W Xe lamp with a 365 nm monochromatic LED lamp. To perform the calculations, the following parameters were used:

|                                      |           |                                                    |
|--------------------------------------|-----------|----------------------------------------------------|
| Irradiance,                          | $I$       | $= 100 \text{ mW cm}^{-2} = 1000 \text{ W m}^{-2}$ |
| Area of effective light irradiation, | $A$       | $= 8 \times 10^{-4} \text{ m}^2$                   |
| Plank's constant,                    | $h$       | $= 6.626 \times 10^{-34} \text{ J s}$              |
| Speed of light,                      | $c$       | $= 3 \times 10^{17} \text{ nm s}^{-1}$             |
| Wavelength of incident light,        | $\lambda$ | $= 365 \text{ nm}$                                 |
| Avogadro's number,                   | $N_A$     | $= 6.022 \times 10^{23} \text{ mol}^{-1}$          |

Incident light intensity,  $(I_0) = I \times A$

$$\text{Photon energy, } (E_p) = \frac{hc}{\lambda} = \frac{(6.626 \times 10^{-34} \text{ J s}) \times (3 \times 10^{17} \text{ nm s}^{-1})}{365 \text{ nm}}$$

Therefore, the number of incident photons per unit time ( $N_P$ ) can be calculated as:

$$N_P = \frac{I_0}{E_p}$$

The number of moles of incident photons per unit time ( $M_P$ ) can be calculated by dividing  $N_P$  by  $N_A$  such that:

$$M_P = \frac{N_P}{N_A}$$

Finally, AQE is calculated by dividing the moles of reacted electrons by  $M_P$  such that:

$$AQE (\%) = \frac{2 \times H_{2\text{produced}} + 2 \times CO_{\text{produced}} + 8 \times CH_{4\text{produced}}}{M_P} \times 100$$

## Supporting data

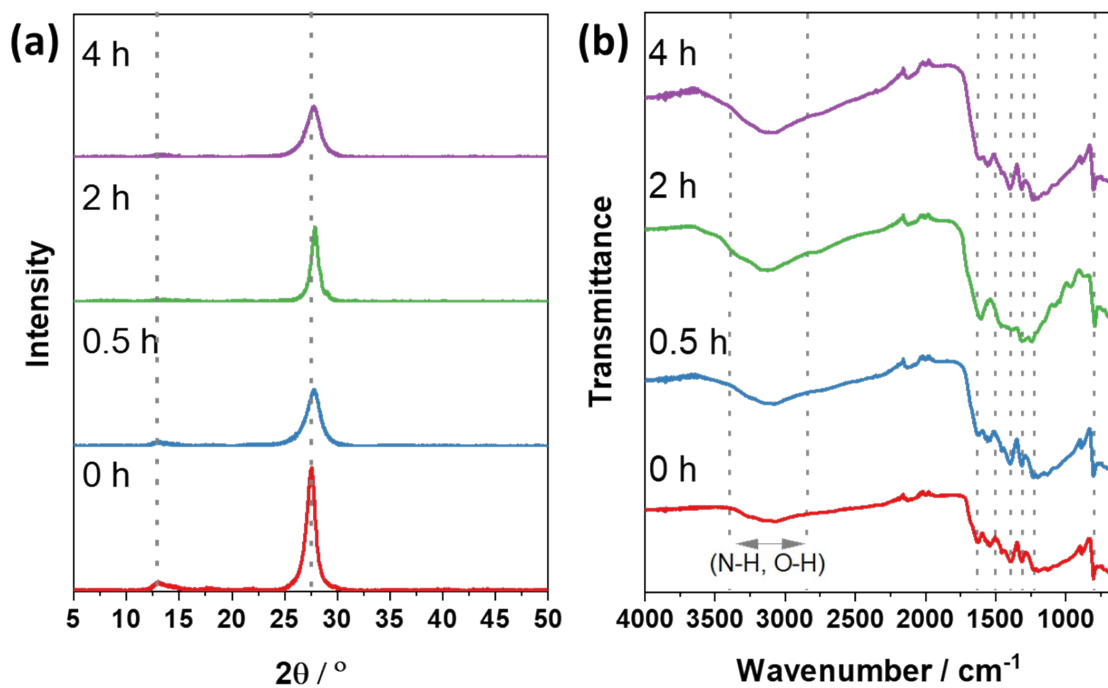

**Figure S1:** (a) X-ray diffractograms and (b) FT-IR spectra of BGCN (0 h) and EGCN (0.5, 2, 4 h) samples.

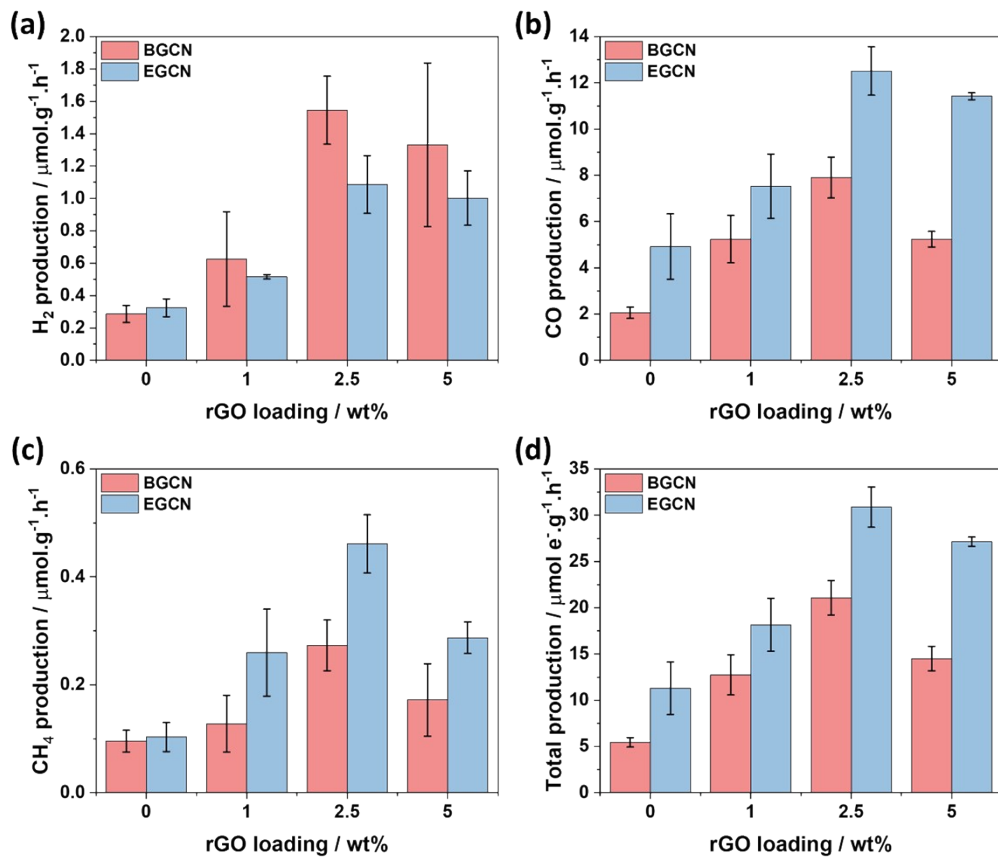

**Figure S2:** Production rates of the BGCN/rGO and EGCN/rGO samples for (a) H<sub>2</sub>, (b) CO, and (c) CH<sub>4</sub>. (d) Total production on an electron basis.

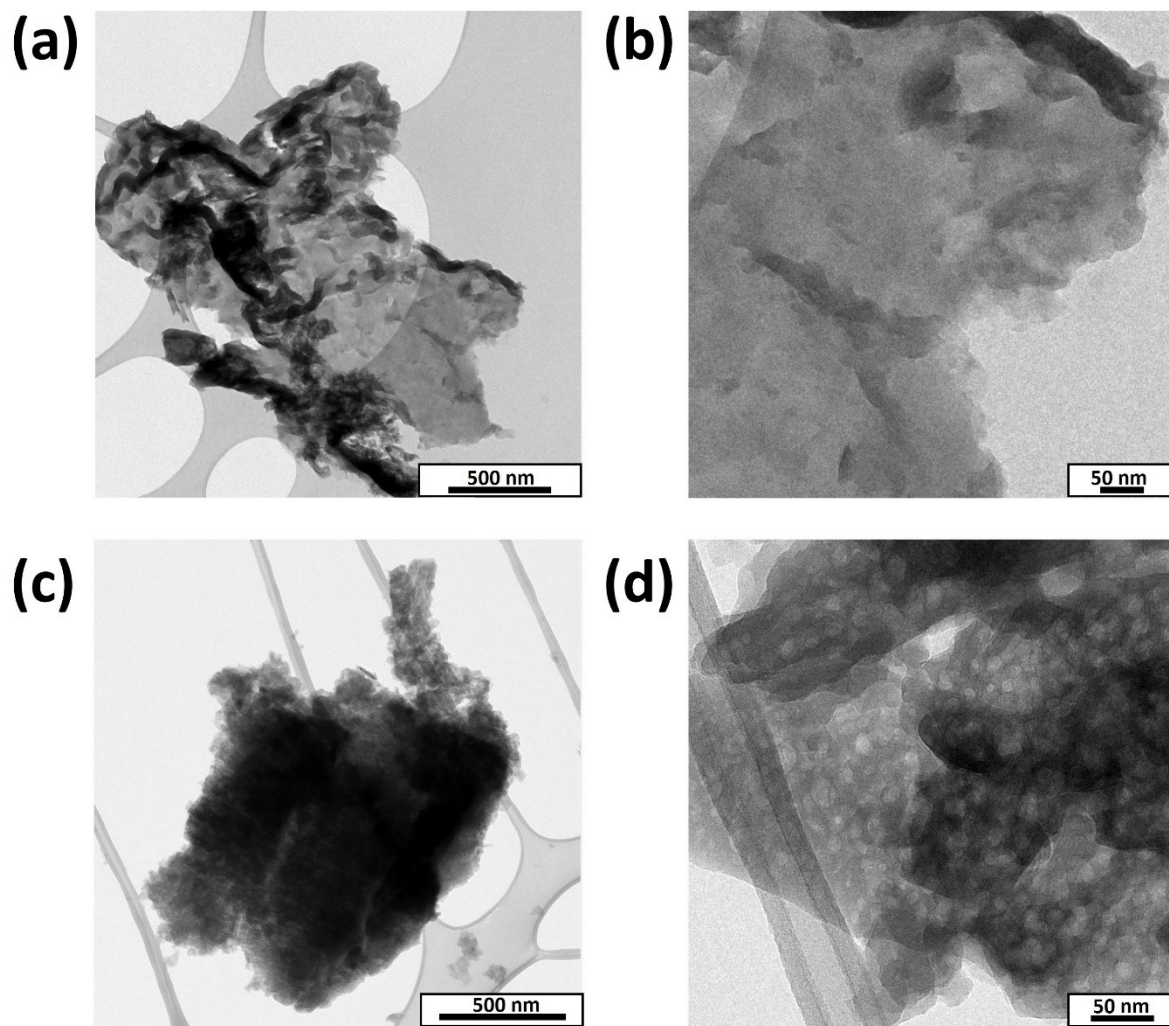

**Figure S3:** TEM micrographs of (a-b) BGCN and (c-d) 2EGCN.

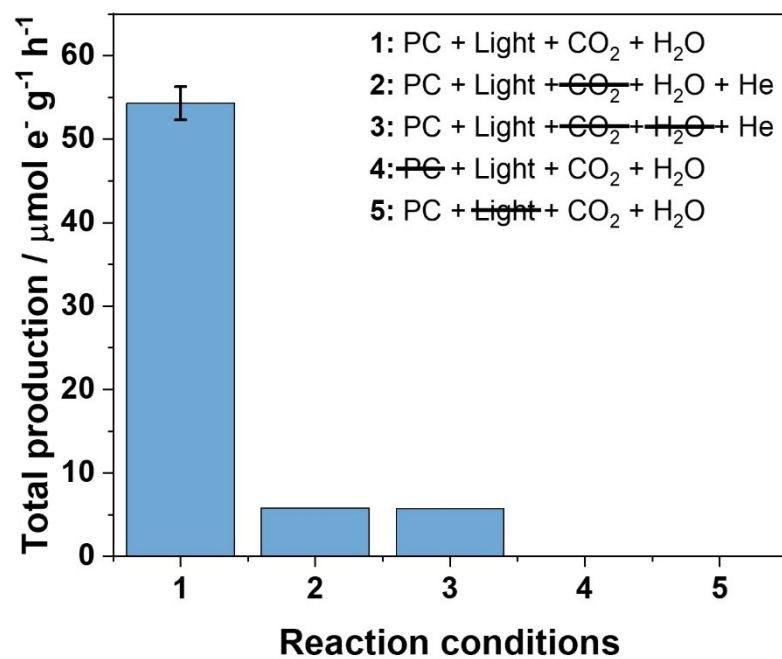

**Figure S4:** Control tests performed on EGCN/rGO/CBB in the absence of (2) CO<sub>2</sub>, (3) CO<sub>2</sub> and H<sub>2</sub>O, (4) the photocatalyst, and (5) light.

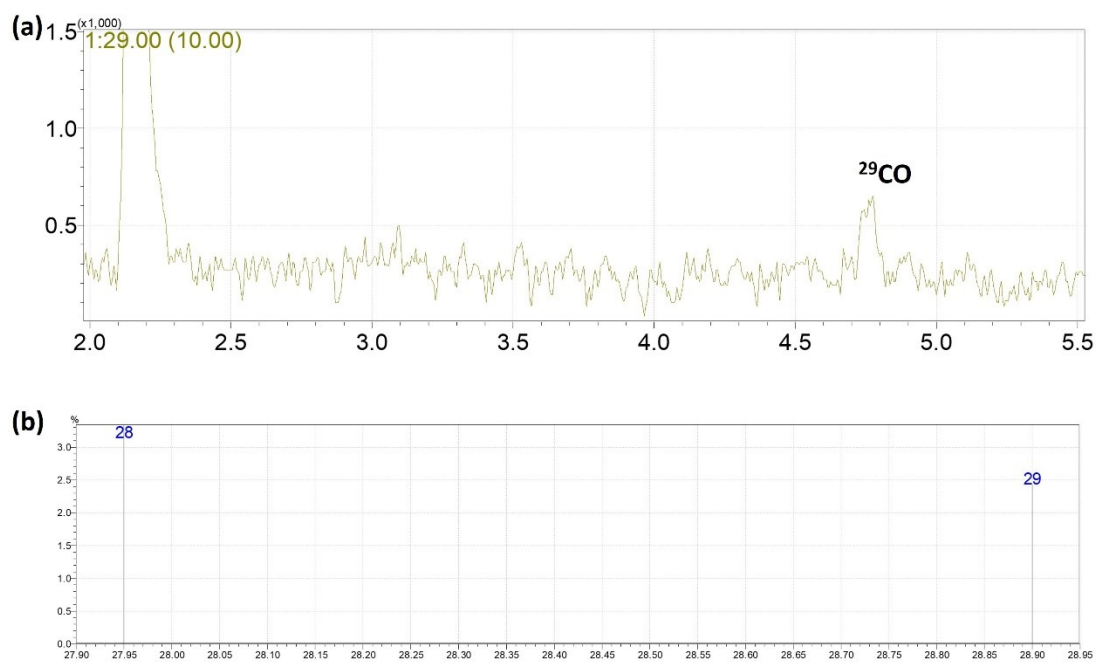

**Figure S5:** Mass chromatography spectra showing (a) fragmented peaks for m/z 28 and 29 with retention time and (a) relative intensity with respect to m/z ratio after conducting a 2 h batch reaction on EGCN/rGO/CBB using isotope labelled  $^{13}\text{CO}_2$

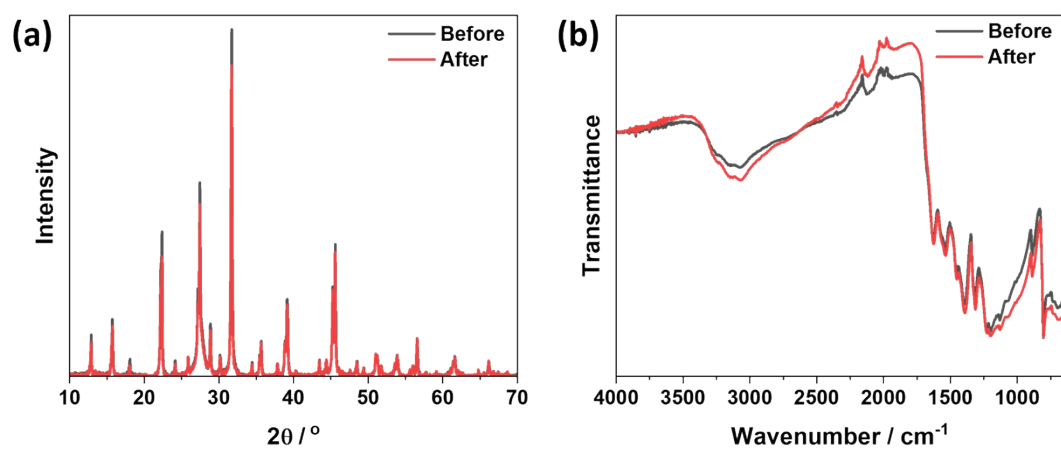

**Figure S6:** (a) XRD diffractograms and (b) FT-IR spectra of EGCN/rGO/CBB sample before and after a 1 hr reaction.



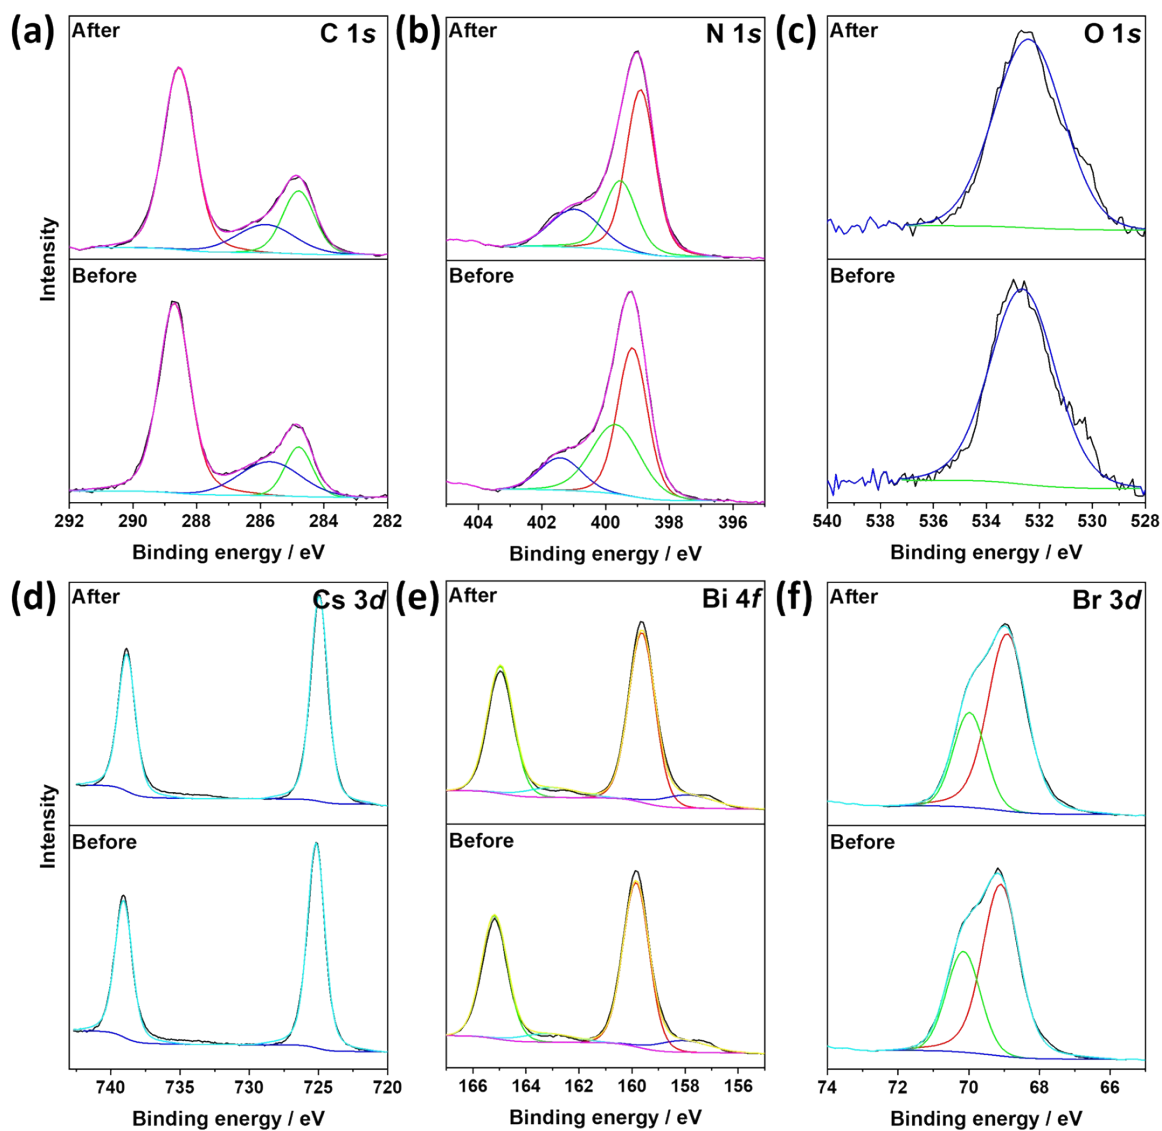

**Figure S7:** XPS scans of (a) C 1s, (b) N 1s, (c) O 1s, (d) Cs 3d, (e) Bi 4f, (f) Br 3d for EGCN/rGO/CBB samples before and after a 1 hr reaction.

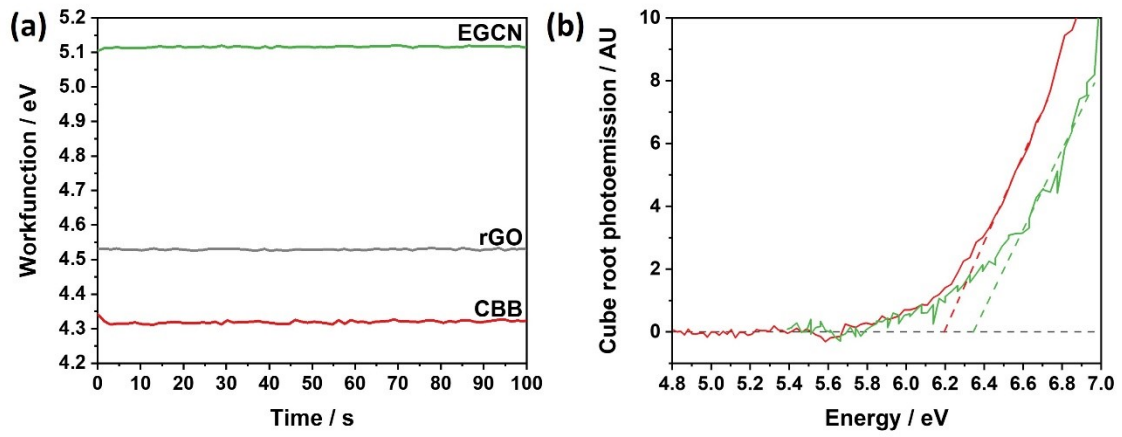

**Figure S8:** (a) Work function values of rGO, 2EGCN, and CBB from Kelvin probe measurements. (b) Cube root photoemission data extrapolated to gather valence band edge positions of 2EGCN and CBB.

**Table S1: Summary of production rates of H<sub>2</sub>, CO, and CH<sub>4</sub> for all samples in  $\mu\text{mol g}^{-1}\text{h}^{-1}$**

|                     | Production ( $\mu\text{mol g}^{-1}\text{h}^{-1}$ ) |                  |                 |
|---------------------|----------------------------------------------------|------------------|-----------------|
|                     | H <sub>2</sub>                                     | CO               | CH <sub>4</sub> |
| <b>BGCN</b>         | 0.00 $\pm$ 0.00                                    | 2.06 $\pm$ 0.24  | 0.00 $\pm$ 0.00 |
| <b>0.5EGCN</b>      | 0.64 $\pm$ 0.16                                    | 1.45 $\pm$ 0.28  | 0.25 $\pm$ 0.06 |
| <b>2EGCN</b>        | 1.59 $\pm$ 0.50                                    | 1.83 $\pm$ 0.45  | 0.60 $\pm$ 0.12 |
| <b>4EGCN</b>        | 1.33 $\pm$ 0.42                                    | 1.61 $\pm$ 0.42  | 0.32 $\pm$ 0.03 |
| <b>BGCN/1rGO</b>    | 0.63 $\pm$ 0.29                                    | 5.24 $\pm$ 1.03  | 0.13 $\pm$ 0.05 |
| <b>BGCN/2.5rGO</b>  | 1.55 $\pm$ 0.21                                    | 7.90 $\pm$ 0.89  | 0.27 $\pm$ 0.05 |
| <b>BGCN/5rGO</b>    | 1.33 $\pm$ 0.51                                    | 5.23 $\pm$ 0.34  | 0.17 $\pm$ 0.07 |
| <b>EGCN/1rGO</b>    | 0.52 $\pm$ 0.01                                    | 7.53 $\pm$ 1.39  | 0.26 $\pm$ 0.08 |
| <b>EGCN/2.5rGO</b>  | 1.09 $\pm$ 0.18                                    | 12.51 $\pm$ 1.05 | 0.46 $\pm$ 0.05 |
| <b>EGCN/5rGO</b>    | 1.00 $\pm$ 0.17                                    | 11.42 $\pm$ 0.15 | 0.29 $\pm$ 0.03 |
| <b>BGCN/CBB</b>     | 0.29 $\pm$ 0.16                                    | 7.13 $\pm$ 0.76  | 0.07 $\pm$ 0.02 |
| <b>BGCN/rGO/CBB</b> | 0.92 $\pm$ 0.17                                    | 6.72 $\pm$ 0.36  | 0.13 $\pm$ 0.06 |
| <b>EGCN/CBB</b>     | 0.50 $\pm$ 0.11                                    | 12.88 $\pm$ 1.40 | 0.21 $\pm$ 0.10 |
| <b>EGCN/rGO/CBB</b> | 1.27 $\pm$ 0.35                                    | 23.76 $\pm$ 0.86 | 0.53 $\pm$ 0.09 |

**Table S2: Summary of similar photocatalytic systems reported in literature for photocatalytic CO<sub>2</sub> reduction.**

| Photocatalyst                                                                           | Production (μmol g <sup>-1</sup> h <sup>-1</sup> ) |       | Medium                                                           | Reaction conditions | Light source                                   | Ref. in manuscript |
|-----------------------------------------------------------------------------------------|----------------------------------------------------|-------|------------------------------------------------------------------|---------------------|------------------------------------------------|--------------------|
|                                                                                         |                                                    |       |                                                                  |                     |                                                |                    |
| g-C <sub>3</sub> N <sub>4</sub> /rGO/Cs <sub>3</sub> Bi <sub>2</sub> Br <sub>9</sub>    | H <sub>2</sub>                                     | 1.3   | CO <sub>2</sub> (g) saturated with H <sub>2</sub> O              | ambient conditions  | 300 W Xe, AM 1.5G, 100 mW cm <sup>-2</sup>     | This work          |
|                                                                                         | CO                                                 | 23.8  |                                                                  |                     |                                                |                    |
|                                                                                         | CH <sub>4</sub>                                    | 0.5   |                                                                  |                     |                                                |                    |
| 40 wt% Cs <sub>3</sub> Bi <sub>2</sub> Br <sub>9</sub> /g-C <sub>3</sub> N <sub>4</sub> | CO                                                 | 14.2  | CO <sub>2</sub> (g) saturated with H <sub>2</sub> O              | ambient conditions  | 300 W Xe, AM 1.5G, 100 mW cm <sup>-2</sup>     | [1]                |
| MCM-41/Cs <sub>3</sub> Bi <sub>2</sub> Br <sub>9</sub>                                  | CO                                                 | 17.2  | CO <sub>2</sub> (g) saturated with H <sub>2</sub> O              | 20 °C               | 300 W Xe (λ ≥ 420 nm), 350 mW cm <sup>-2</sup> | [2]                |
| g-C <sub>3</sub> N <sub>4</sub> /rGO/NiAl-LDHs                                          | CO                                                 | 2.6   | CH <sub>3</sub> CN:TEOA:H <sub>2</sub> O = 3:1:1 (v/v/v)         | 10 °C               | 300 W Xe, 1000 mW cm <sup>-2</sup>             | [3]                |
|                                                                                         | CH <sub>4</sub>                                    | 20.0  |                                                                  |                     |                                                |                    |
| g-C <sub>3</sub> N <sub>4</sub> /NiAl-LDHs                                              | CO                                                 | 8.2   | CO <sub>2</sub> (g) saturated with H <sub>2</sub> O              | ambient conditions  | 300 W Xe (λ ≥ 420 nm)                          | [4]                |
| g-C <sub>3</sub> N <sub>4</sub> /rGO                                                    | H <sub>2</sub>                                     | 68    | 0.2 M NaHCO <sub>3</sub> solution saturated with CO <sub>2</sub> | ambient conditions  | 300 W Xe, AM 1.5G                              | [5]                |
|                                                                                         | CH <sub>3</sub> OH                                 | 114   |                                                                  |                     |                                                |                    |
| rGO with g-C <sub>3</sub> N <sub>4</sub> /CdS                                           | CO                                                 | 23.93 | TEOA/H <sub>2</sub> O solution saturated with CO <sub>2</sub>    | 0.4 MPa             | 300 W Xe                                       | [6]                |
| CsPbBr <sub>3</sub> /g-C <sub>3</sub> N <sub>4</sub>                                    | CO                                                 | 28.5  | CO <sub>2</sub> (g) saturated with H <sub>2</sub> O              | -                   | 300 W Xe (λ ≥ 420 nm)                          | [7]                |
| Cs <sub>3</sub> Bi <sub>2</sub> Br <sub>9</sub> /BiVO <sub>4</sub>                      | CO                                                 | 70.63 | CO <sub>2</sub> (g) with H <sub>2</sub> O                        | 25 °C, 101.3 kPa    | 300 W Xe, AM 1.5G, 100 mW cm <sup>-2</sup>     | [8]                |

**Table S3: Summary of the band gap, Work function, and band edge positions of the materials**

| <b>Material</b> | <b>Band gap (<math>E_g</math>) / eV</b> | <b>Conduction band (<math>E_C</math>) / eV</b> | <b>Work function (<math>\phi</math>) / eV</b> | <b>Valence band (<math>E_V</math>) / eV</b> |
|-----------------|-----------------------------------------|------------------------------------------------|-----------------------------------------------|---------------------------------------------|
| <b>GO</b>       | -                                       | -                                              | -4.588                                        | -                                           |
| <b>rGO</b>      | -                                       | -                                              | -4.526                                        | -                                           |
| <b>BGCN</b>     | 2.9                                     | -3.52                                          | -5.056                                        | -6.39                                       |
| <b>EGCN</b>     | 3.1                                     | -3.37                                          | -5.116                                        | -6.48                                       |
| <b>CBB</b>      | 2.6                                     | -3.59                                          | -4.319                                        | -6.19                                       |

**Table S4: Summary of XPS elemental peaks for CBB, EGCN, EGCN/rGO, and EGCN/rGO/CBB**

|                        |                     | Peak binding energy (eV) |          |              |        |
|------------------------|---------------------|--------------------------|----------|--------------|--------|
|                        |                     | EGCN                     | EGCN/rGO | EGCN/rGO/CBB | CBB    |
| <b>C 1s</b>            | C-C                 | 284.80                   | 284.80   | 284.80       | 284.80 |
|                        | (C) <sub>3</sub> -N | 286.28                   | 286.35   | 286.34       | -      |
|                        | C-N-C               | 288.39                   | 288.29   | 288.53       | -      |
|                        | O-C=O               | 289.21                   | -        | -            | -      |
| <b>N 1s</b>            | C-N=C               | 298.90                   | 398.82   | 399.01       | -      |
|                        | (C) <sub>3</sub> -N | 400.11                   | 400.17   | 400.34       | -      |
|                        | C-N-H               | 401.22                   | 401.25   | 401.59       | -      |
| <b>Cs</b>              | 3d <sub>5</sub>     | -                        | -        | 724.97       | 724.91 |
|                        | 3d <sub>3</sub>     | -                        | -        | 738.90       | 738.83 |
| <b>Bi<sup>0</sup></b>  | 4f <sub>7</sub>     | -                        | -        | 157.82       | -      |
|                        | 4f <sub>5</sub>     | -                        | -        | 162.93       | -      |
| <b>Bi<sup>3+</sup></b> | 4f <sub>7</sub>     | -                        | -        | 159.62       | 159.54 |
|                        | 4f <sub>5</sub>     | -                        | -        | 164.93       | 164.80 |
| <b>Br</b>              | 3d <sub>5/2</sub>   | -                        | -        | 69.08        | 68.83  |
|                        | 3d <sub>3/2</sub>   | -                        | -        | 70.19        | 69.87  |

## References

1. Baghdadi, Y., et al., *Cs<sub>3</sub>Bi<sub>2</sub>Br<sub>9</sub>/g-C<sub>3</sub>N<sub>4</sub> Direct Z-Scheme Heterojunction for Enhanced Photocatalytic Reduction of CO<sub>2</sub> to CO*. Chemistry of Materials, 2023. **35**(20): p. 8607-8620.
2. Cui, Z., et al., *Space-confined growth of lead-free halide perovskite Cs<sub>3</sub>Bi<sub>2</sub>Br<sub>9</sub> in MCM-41 molecular sieve as an efficient photocatalyst for CO<sub>2</sub> reduction at the gas-solid condition under visible light*. Applied Catalysis B: Environmental, 2022. **310**: p. 121375.
3. Zhou, D., et al., *Reduced graphene oxide assisted g-C<sub>3</sub>N<sub>4</sub>/rGO/NiAl-LDHs type II heterostructure with high performance photocatalytic CO<sub>2</sub> reduction*. Chemical Engineering Journal, 2022. **450**: p. 138108.
4. Tonda, S., et al., *g-C<sub>3</sub>N<sub>4</sub>/NiAl-LDH 2D/2D Hybrid Heterojunction for High-Performance Photocatalytic Reduction of CO<sub>2</sub> into Renewable Fuels*. ACS Applied Materials & Interfaces, 2018. **10**(3): p. 2667-2678.
5. Sahoo, R.C., et al., *Bandgap engineered g-C<sub>3</sub>N<sub>4</sub> and its graphene composites for stable photoreduction of CO<sub>2</sub> to methanol*. Carbon, 2022. **192**: p. 101-108.
6. Zhao, X., et al., *Reduced graphene oxide-modified Z-scheme g-C<sub>3</sub>N<sub>4</sub>/CdS photocatalyst with a staggered structure for the enhanced photoreduction of CO<sub>2</sub>*. Sustainable Energy & Fuels, 2022. **6**(16): p. 3768-3777.
7. Cheng, R., et al., *Incorporation of Cesium Lead Halide Perovskites into g-C<sub>3</sub>N<sub>4</sub> for Photocatalytic CO<sub>2</sub> Reduction*. ACS Omega, 2020. **5**(38): p. 24495-24503.
8. Zhou, B., et al., *Strain-Engineering of Mesoporous Cs(3) Bi(2) Br(9) /BiVO(4) S-Scheme Heterojunction for Efficient CO(2) Photoreduction*. Small, 2023. **19**(29): p. e2302058.
